# Supplementary material
Source: PubMed Central journal article supplement (PMC7959913)
Supplement: 16-01052.pdf [file 16-01052.pdf]

**On-line Table: MRI scanners and sequence parameters**

|                        | Baseline           | 9-Year Follow-Up    | 18-Year Follow-Up   | 18-Year Follow-Up |
|------------------------|--------------------|---------------------|---------------------|-------------------|
| MRI scanner            | Signa <sup>a</sup> | Vision <sup>b</sup> | Avanto <sup>b</sup> | Avanto            |
| Field strength         | 1.5T               | 1.5T                | 1.5T                | 1.5T              |
| Sequence type          | TSE                | MPRAGE              | TSE                 | MPRAGE            |
| FOV (mm)               | 250                | 240                 | 220                 | 260               |
| Acquisition matrix     | 192 × 256          | 256 × 256           | 224 × 256           | 256 × 256         |
| Section thickness (mm) | 5                  | 1.5                 | 5                   | 1.5               |
| TR (ms)                | 640                | 1350                | 553                 | 1910              |
| TE (ms)                | 13                 | 7                   | 9.1                 | 3                 |
| TI (ms)                | –                  | 300                 | –                   | 1100              |
| Flip angle             | 90°                | 15°                 | 90°                 | 15°               |
| No. of averages        | 2                  | 1                   | 1                   | 1                 |

<sup>a</sup> GE Healthcare, Milwaukee, Wisconsin.

<sup>b</sup> Siemens, Erlangen, Germany.
